# Supplementary material for: Enhancing the propylene/propane separation performances of ZIF-8 membranes by post-synthetic surface polymerization
Source: Royal Society of Chemistry journal article supplement (doi:10.1039/d1ta08705c), 2021-12-16
Supplement: d1ta08705c1.pdf [file d1ta08705c1.pdf]

## Supporting Information

### Enhancing Propylene/Propane Separation Performances of ZIF-8 Membranes by Post-Synthetic Surface Polymerization

Sunghwan Park<sup>a</sup>, Kie Yong Cho<sup>b</sup> and Hae-Kwon Jeong<sup>\*,a,c</sup>

<sup>a</sup> *Artie McFerrin Department of Chemical Engineering and <sup>c</sup> Department of Materials Science and Engineering, Texas A&M University, 3122 TAMU, College Station, TX 77843-3122, United States*

<sup>b</sup> *Department of Industrial Chemistry, Pukyong National University, 45 Yongso-ro, Nam-gu, Busan 48513, Republic of Korea*

*\* Corresponding author:*

*H.-K. Jeong (e-mail address: [hjeong7@tamu.edu](mailto:hjeong7@tamu.edu), Phone: +1-979-862-4850, Fax: +1-979-845-6446)*

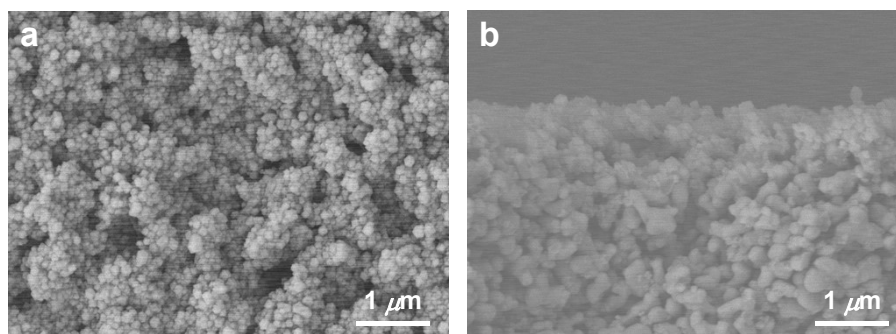

**Figure S1.** SEM images of a ZIF-8 seed layer: **a** top view and **b** cross-sectional view.

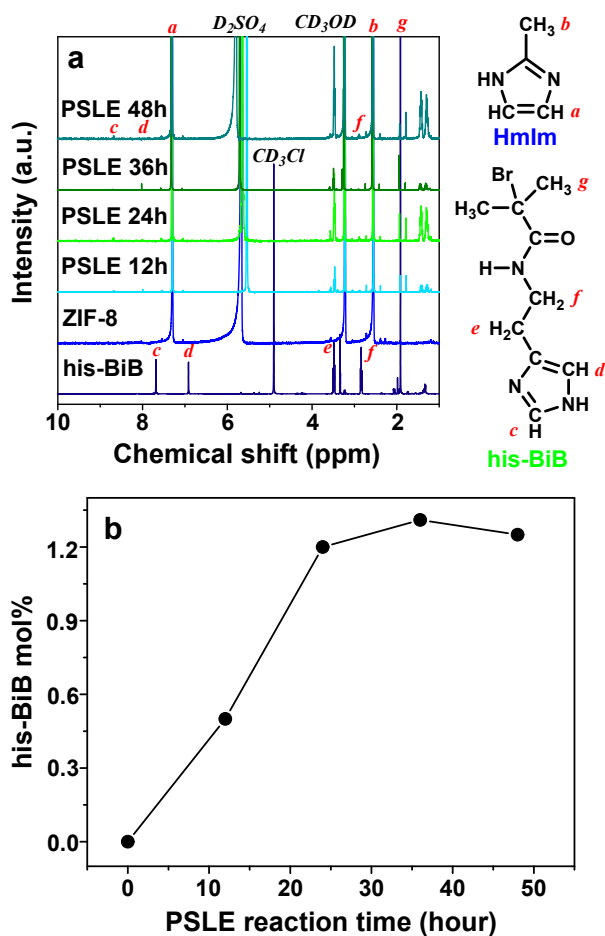

**Figure S2. a**  $^1H$  NMR spectra of his-BiB, ZIF-8, and ZIF-8-BiB membranes and **b** his-BiB contents of ZIF-8-BiB membranes as a function of different PSLE reaction times. The unidentified signals in (a) are attributed to TEA·HBr salt as a byproduct.

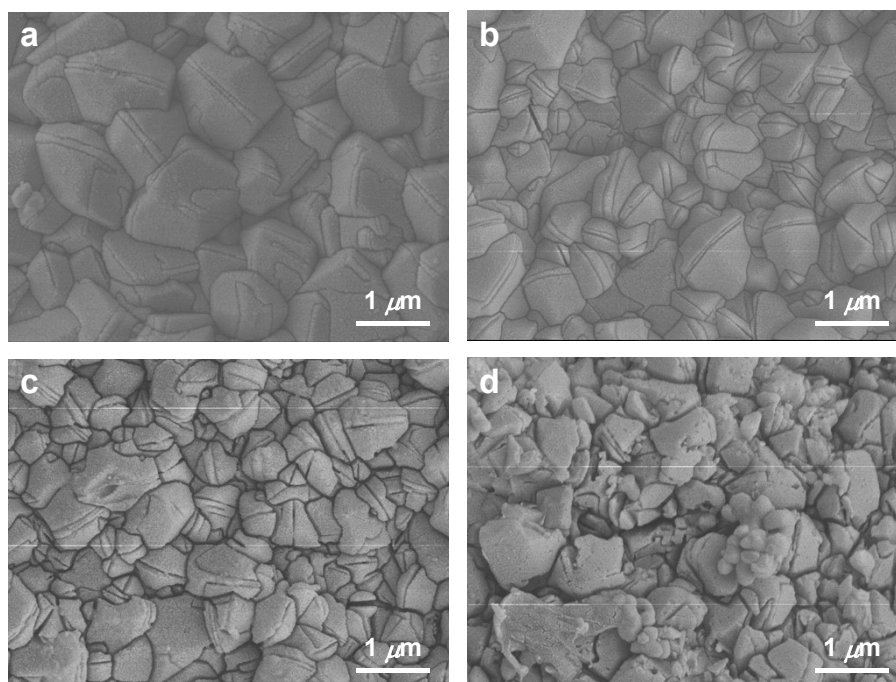

**Figure S3.** SEM images of ZIF-8-BiB membranes treated for different PSLE times: **a** 12 h, **b** 24 h, **c** 36 h, and **d** 48 h.

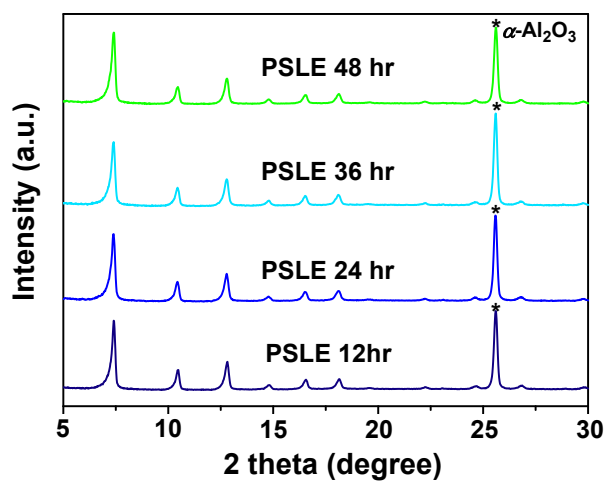

**Figure S4.** Diffraction patterns of ZIF-8-BiB membranes for different PSLE times.

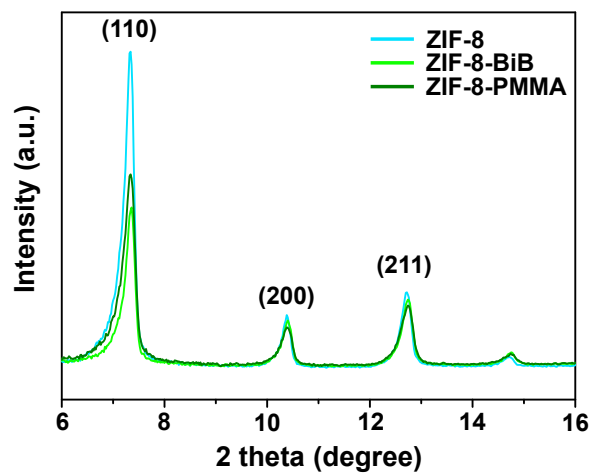

**Figure S5.** PXRD patterns of a ZIF-8 membrane, a ZIF-8-BiB membrane, and a ZIF-8-PMMA membrane.

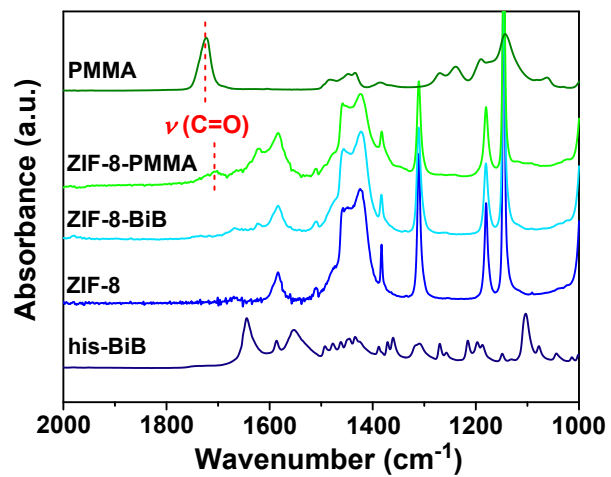

**Figure S6.** FT-IR spectra of his-BiB, bulk PMMA, ZIF-8 membrane, ZIF-8-BiB membrane, and ZIF-8-PMMA membrane.

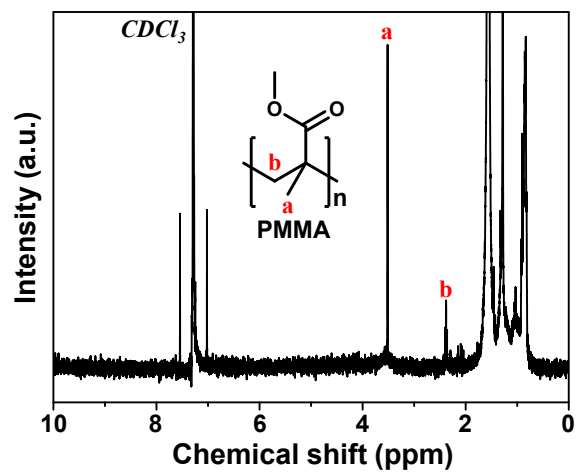

**Figure S7.**  $^1\text{H}$  NMR spectrum of PMMA obtained from a digested ZIF-8-PMMA membrane.

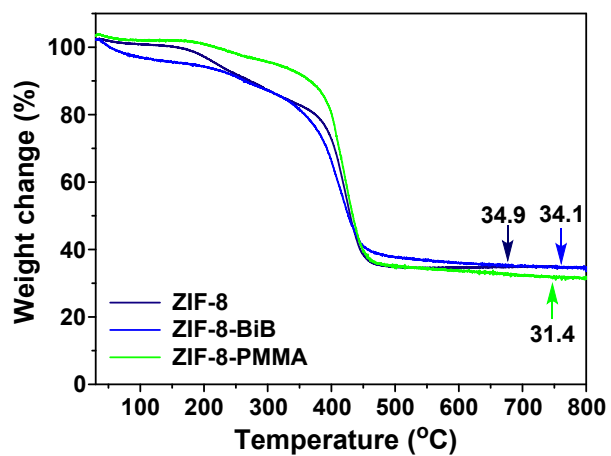

**Figure S8.** Thermograms of ZIF-8, ZIF-8-BiB, and ZIF-8-PMMA membranes. Note that the weight of the  $\alpha$ -Al<sub>2</sub>O<sub>3</sub> substrate was subtracted.



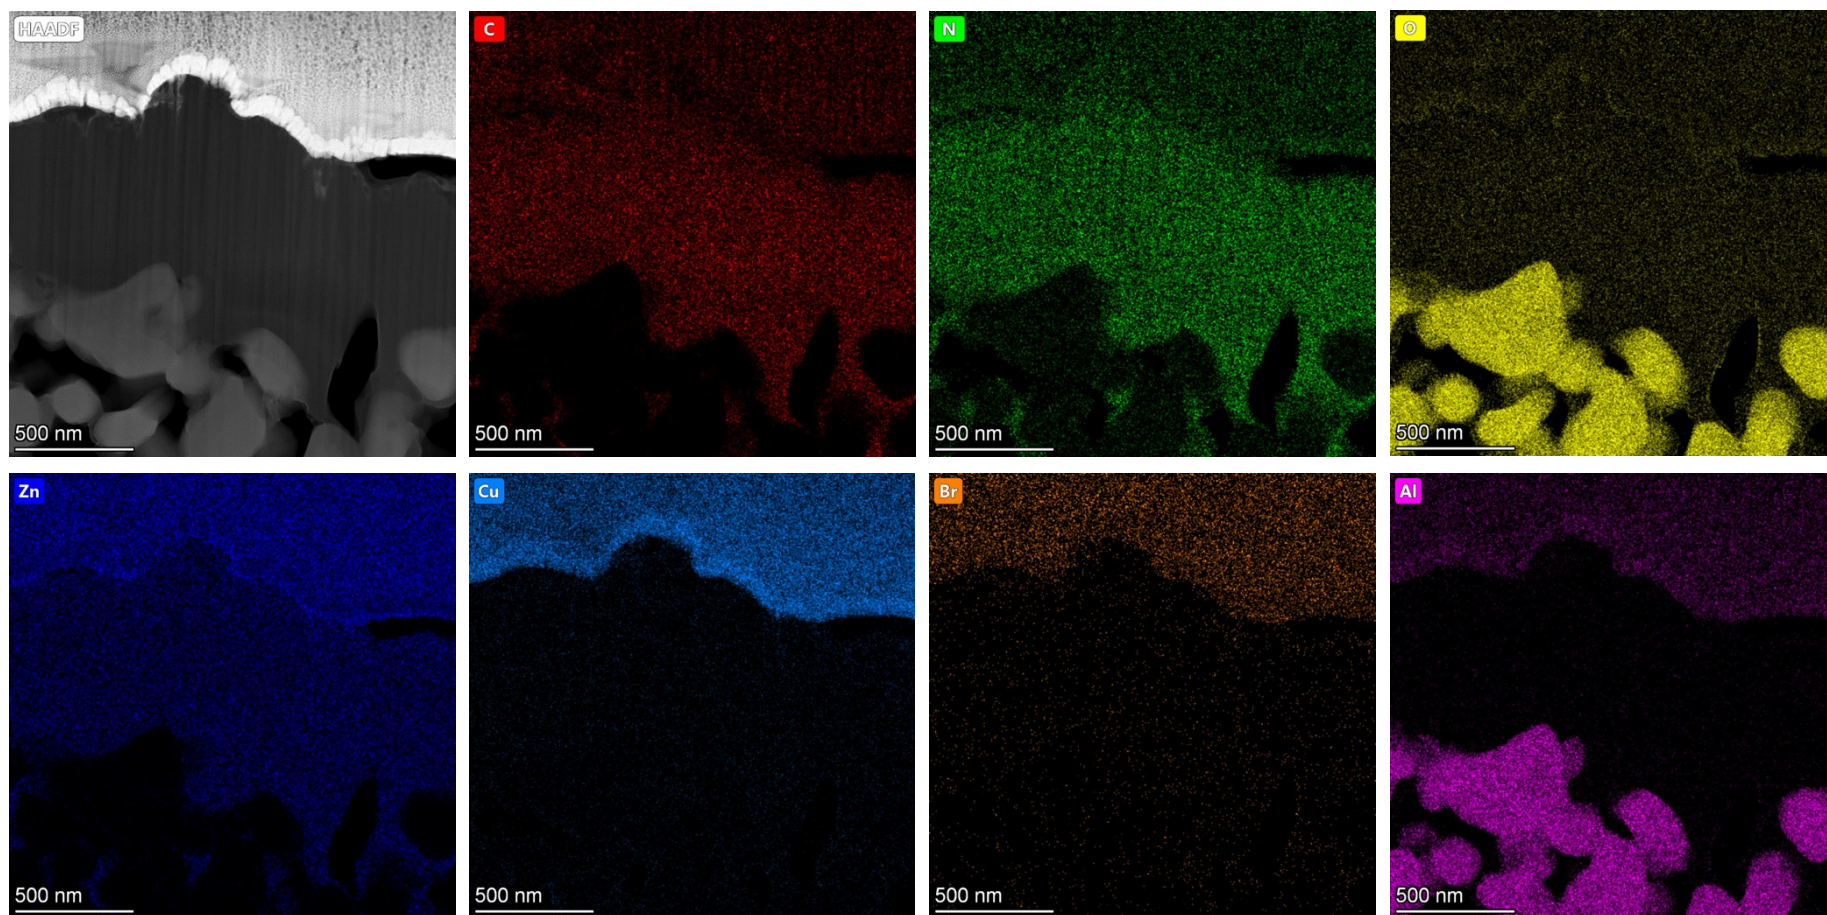

**Figure S9.** EDX elemental mapping images of a ZIF-8-PMMA membrane.

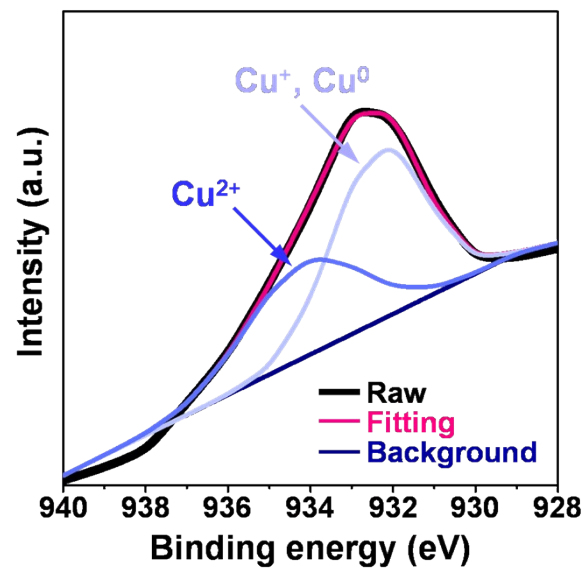

**Figure S10.** Cu 2p<sub>3/2</sub> XPS spectra and deconvoluted curves of a ZIF-8-PMMA membrane.

**Table S1.** Permeation data measured at room temperature and  $\sim 1$  atm.

| Sample     | No.  | $\text{C}_3\text{H}_6$ permeance<br>( $\text{mol m}^{-2} \text{s}^{-1} \text{Pa}^{-1}$ ) | $\text{C}_3\text{H}_8$ permeance<br>( $\text{mol m}^{-2} \text{s}^{-1} \text{Pa}^{-1}$ ) | $\text{C}_3\text{H}_6/\text{C}_3\text{H}_8$<br>separation factor |
|------------|------|------------------------------------------------------------------------------------------|------------------------------------------------------------------------------------------|------------------------------------------------------------------|
| ZIF-8      | 1    | $4.04 \times 10^{-8}$                                                                    | $4.57 \times 10^{-10}$                                                                   | 88.5                                                             |
|            | 2    | $3.76 \times 10^{-8}$                                                                    | $6.31 \times 10^{-10}$                                                                   | 59.6                                                             |
|            | 3    | $4.47 \times 10^{-8}$                                                                    | $10.6 \times 10^{-10}$                                                                   | 42.1                                                             |
|            | Ave. | $4.31 \pm 0.53 \times 10^{-8}$                                                           | $7.17 \pm 2.54 \times 10^{-10}$                                                          | $60.1 \pm 13.9$                                                  |
| ZIF-8-BiB  | 1    | $3.35 \times 10^{-8}$                                                                    | $5.80 \times 10^{-10}$                                                                   | 57.8                                                             |
|            | 2    | $3.33 \times 10^{-8}$                                                                    | $7.53 \times 10^{-10}$                                                                   | 44.3                                                             |
|            | 3    | $3.07 \times 10^{-8}$                                                                    | $8.66 \times 10^{-10}$                                                                   | 42.1                                                             |
|            | Ave. | $3.25 \pm 1.57 \times 10^{-8}$                                                           | $7.33 \pm 1.44 \times 10^{-10}$                                                          | $44.4 \pm 6.6$                                                   |
| ZIF-8-PMMA | 1    | $4.23 \times 10^{-8}$                                                                    | $3.97 \times 10^{-10}$                                                                   | 106.6                                                            |
|            | 2    | $7.82 \times 10^{-8}$                                                                    | $7.42 \times 10^{-10}$                                                                   | 105.3                                                            |
|            | 3    | $4.68 \times 10^{-8}$                                                                    | $4.47 \times 10^{-10}$                                                                   | 104.7                                                            |
|            | Ave. | $5.58 \pm 1.82 \times 10^{-8}$                                                           | $5.29 \pm 1.86 \times 10^{-10}$                                                          | $105.5 \pm 2.8$                                                  |

**Table S2.** Permeation results of ZIF-8 membranes and the corresponding ZIF-8-PMMA membranes.

| Sample | MMA<br>(mmol) | ZIF-8                                                                                              |                                                                                   | ZIF-8-PMMA                                                                                         |                                                                                   |
|--------|---------------|----------------------------------------------------------------------------------------------------|-----------------------------------------------------------------------------------|----------------------------------------------------------------------------------------------------|-----------------------------------------------------------------------------------|
|        |               | C <sub>3</sub> H <sub>6</sub> permeance<br>(mol m <sup>-2</sup> s <sup>-1</sup> Pa <sup>-1</sup> ) | C <sub>3</sub> H <sub>6</sub> /C <sub>3</sub> H <sub>8</sub><br>separation factor | C <sub>3</sub> H <sub>6</sub> permeance<br>(mol m <sup>-2</sup> s <sup>-1</sup> Pa <sup>-1</sup> ) | C <sub>3</sub> H <sub>6</sub> /C <sub>3</sub> H <sub>8</sub><br>separation factor |
| S1     | 0.14          | 6.39 x 10 <sup>-8</sup>                                                                            | 4.2                                                                               | 5.35 x 10 <sup>-8</sup>                                                                            | 6.1                                                                               |
| S2     | 0.14          | 3.79 x 10 <sup>-8</sup>                                                                            | 21.0                                                                              | 4.33 x 10 <sup>-8</sup>                                                                            | 54.3                                                                              |
| S3     | 0.14          | 4.38 x 10 <sup>-8</sup>                                                                            | 61.3                                                                              | 5.57 x 10 <sup>-8</sup>                                                                            | 105.6                                                                             |
| S4     | 0.28          | 4.74 x 10 <sup>-8</sup>                                                                            | 58.1                                                                              | 2.94 x 10 <sup>-8</sup>                                                                            | 108.8                                                                             |
| S5     | 0.69          | 5.62 x 10 <sup>-8</sup>                                                                            | 3.2                                                                               | 1.79 x 10 <sup>-8</sup>                                                                            | 59.6                                                                              |
| S6     | 0.69          | 4.17 x 10 <sup>-8</sup>                                                                            | 9.8                                                                               | 1.47 x 10 <sup>-8</sup>                                                                            | 90.9                                                                              |
| S7     | 0.69          | 4.46 x 10 <sup>-8</sup>                                                                            | 66.0                                                                              | 1.20 x 10 <sup>-8</sup>                                                                            | 100.5                                                                             |

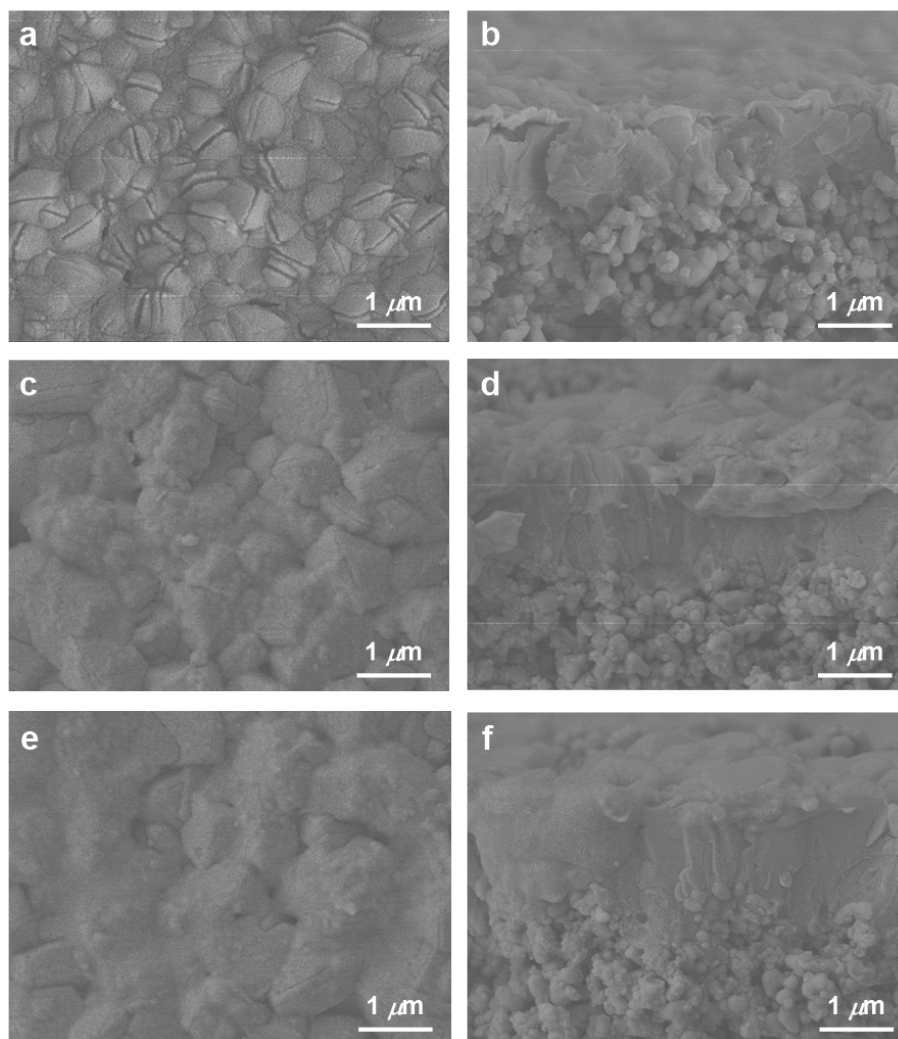

**Figure S11.** SEM images of ZIF-8-PMMA membranes with different PMMA thicknesses controlled by the contents of MMA during the ATRP step. The MMA content varies from 0.1 mmol (**a, b**), to 0.3 mmol (**c, d**), and to 0.7 mmol (**e, f**). On the left are the top views and on the right the cross-sectional views.

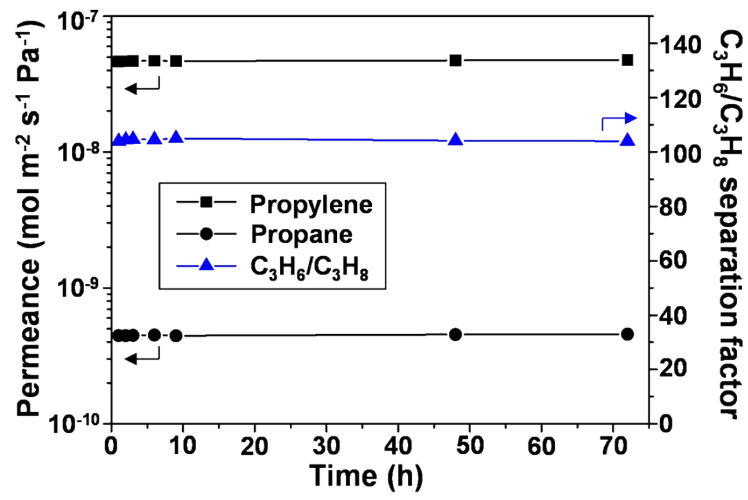

**Figure S12.** Long-term  $\text{C}_3\text{H}_6/\text{C}_3\text{H}_8$  separation performance of the ZIF-8-PMMA membrane.
